# Supplementary material
Source: MDPI journal article supplement (https://www.mdpi.com/1424-2818/15/7/877)
Supplement: s1 [file s1]

## Sheet: Sheet1
Table S2. The importance values of the variables determining the spatial distributions of all plants in native and introduced areas from different latitudes. The Species distribution model were established, and obtained the importance values of all variables, which represent the influence of variables on Species distribution.
Environmental factors	Woody																								Herbaceous
	Native												Introduced												Native												Introduced
	High latitude				Mid latitude				Low latitude				High latitude				Mid latitude				Low latitude				High latitude				Mid latitude				Low latitude				High latitude				Mid latitude				Low latitude
	Picea abies	Picea glauca	Picea mariana		Davidia involucrata	Prunus × yedoensis	Magnolia grandiflora		Bombax ceiba	Jacaranda mimosifolia	Spathodea campanulata		Picea abies	Picea glauca	Picea mariana		Davidia involucrata	Prunus × yedoensis	Magnolia grandiflora		Bombax ceiba	Jacaranda mimosifolia	Spathodea campanulata		Papaver nudicaule	Ononis spinosa	Dryas integrifolia		Tulipa gesneriana	Papaver rhoeas	Rosa chinensis		Zantedeschia aethiopica	Asparagus setaceus	Catharanthus roseus		Papaver nudicaule	Ononis spinosa	Dryas integrifolia		Tulipa gesneriana	Papaver rhoeas	Rosa chinensis		Zantedeschia aethiopica	Asparagus setaceus	Catharanthus roseus
Aspect	0.00893651	0.0200952	0.0109841		0.0250635	0.0165079	0.00369841		0.0118254	0.00936508	0.00646032		0.00796825	0.00834921	0.0464444		0.0223016	0.0169683	0.010619		0.0359841	0.00595238	0.00668254		0.0212063	0.0170635	0.00306		0.00403175	0.010619	0.0130317		0.0125238	0.00831746	0.0078254		0.0103968	0.0127302	0.00603333		0.0419048	0.00836508	0.00750794		0.0064127	0.00493651	0.00730159
Awcclass	0.00955556	0.011381	0.009		0.0278889	0.00580952	0.0015873		0.00142857	0.0333016	0.00466667		0.00946032	0.00428571	0.0306667		0.00763492	0	0.00168254		0.0162222	0.00125397	0		0.0237937	0	0.000573333		0.00711111	0.00665079	0.0157619		0	0	0.00339683		0.0068254	0.00753968	0.00114667		0.0179206	0.0014127	0.00384127		0.00303175	0.00144444	0.00247619
BIO1	0.197524	0	0.201841		0	0	0.132603		0	0	0		0.159143	0.16681	0.190619		0	0	0		0	0.209524	0		0.142444	0.541841	0.0810333		0.152619	0.0875714	0		0.187127	0.178968	0		0.297286	0.161175	0		0.106143	0.113032	0.0980476		0.129175	0.0816667	0
BIO10	0	0	0		0	0	0		0	0.0469683	0		0	0	0		0	0	0.0143968		0	0	0		0.483794	0	0		0	0	0		0	0	0		0	0	0		0	0	0		0	0	0
BIO11	0	0	0		0.251603	0.141	0		0	0	0.0965556		0	0	0		0	0	0		0	0	0.140413		0	0	0		0	0	0		0.405302	0	0.180635		0	0	0.0716133		0	0	0		0	0	0
BIO12	0	0	0		0	0	0		0.289714	0.0663492	0		0.068746	0	0		0	0	0		0.0899206	0.0426984	0		0	0.195889	0		0	0	0.111968		0.0523175	0.0864603	0.0776508		0.112571	0	0.108907		0.132841	0.0273651	0.0832063		0.0229524	0.0384762	0.120349
BIO13	0	0	0		0	0	0		0	0	0.0214762		0	0	0		0	0	0.0657937		0	0	0.0318095		0	0	0		0.0310952	0	0		0	0	0		0	0	0		0.0504762	0	0		0	0	0
BIO14	0	0.151524	0.100508		0	0.149222	0		0.0203651	0.0137302	0.0392857		0	0.188794	0		0.0705079	0	0		0.0632698	0.0151905	0		0	0	0		0.0594762	0.0487143	0		0	0	0.0273968		0	0.0422698	0		0	0.017381	0.0330317		0.0159841	0.00911111	0.0163016
BIO15	0.0943175	0	0		0	0	0		0.0874762	0	0		0.127984	0.0476984	0		0.133714	0	0.0242381		0.068381	0	0		0	0.0903333	0.01398		0.121857	0	0.148397		0.0333333	0.0413175	0		0.0843333	0.0573016	0.01496		0.0771587	0	0.0422063		0.019254	0	0
BIO16	0	0	0		0	0	0.0235556		0	0	0		0	0	0		0	0	0		0	0	0		0	0	0		0	0.0441587	0		0	0	0		0	0	0		0	0	0		0	0	0
BIO17	0	0	0		0	0	0.292175		0	0	0		0	0	0		0	0.0442063	0.0425873		0	0	0.0180794		0	0	0.0657867		0	0	0		0	0	0		0	0	0		0	0	0		0	0	0
BIO18	0	0.105984	0.0546825		0.483968	0.479048	0		0.0648254	0.0644762	0.0212857		0	0	0.0475873		0	0.311063	0		0.155587	0	0.0416508		0.172603	0	0.04494		0	0	0		0	0	0.0779206		0.104111	0	0		0.101032	0	0		0	0	0.0476825
BIO19	0.0831587	0	0		0.0896349	0	0		0.0486032	0.0214286	0.0466508		0	0	0.17046		0.0984762	0.0396508	0.0510159		0	0.0174762	0		0	0	0		0	0	0.0766984		0.0199365	0.0593016	0.0183016		0	0	0.0781933		0.151889	0.144587	0.0639048		0.110921	0.0484762	0.0394127
BIO2	0.184921	0.101698	0.082619		0.0381905	0	0.0517302		0.0639524	0.00807936	0		0.0098254	0.0404286	0.186063		0	0.0134286	0.0555714		0.0195714	0.00312698	0.0207302		0.0465238	0.0132222	0		0.0849524	0.0813333	0.099746		0.021127	0.0183968	0.0190794		0	0.0654762	0.0292867		0.0556032	0.0232698	0.0100317		0.00706349	0.00395238	0.010381
BIO3	0.0434286	0.101778	0.0857619		0.0442063	0.0238889	0		0	0	0		0.0411587	0.0431587	0.0241905		0	0.036873	0.0203016		0.0884444	0	0		0	0.0565397	0.00821333		0.0459206	0.0646508	0.0864921		0.0237619	0.311397	0.321381		0.0516349	0.0737937	0.0221267		0.0328413	0.0325714	0.0197778		0.00725397	0	0
BIO4	0	0	0		0.158746	0	0.0525714		0	0.34727	0.42619		0	0.259905	0		0.081	0	0		0	0.335794	0.291794		0	0	0.1038		0	0	0		0	0	0		0	0	0.22136		0	0	0		0	0.243254	0
BIO5	0.141286	0.168349	0		0	0	0.0339365		0.0206667	0	0		0	0	0		0.0518571	0.0272381	0		0.0205079	0.022127	0		0	0	0.12002		0	0	0		0.103429	0	0		0	0.355048	0.0358733		0	0	0.0286032		0	0.00847619	0.0365238
BIO6	0	0	0		0	0	0		0.118746	0.0722857	0		0.102206	0	0		0	0.186889	0.242857		0.205984	0	0		0	0	0		0.183873	0	0		0	0.249762	0		0	0	0		0	0	0		0	0	0.301397
BIO7	0	0.157937	0.12981		0	0.0905238	0		0	0	0.121905		0	0	0		0	0	0		0	0	0		0	0.100476	0		0	0.141127	0.0827778		0.101063	0	0		0.0284921	0	0		0.172317	0.0234762	0		0.161492	0	0
BIO8	0	0.0249683	0.0306984		0	0.0137143	0.00534921		0.0780794	0	0		0.0147937	0.0476667	0.13219		0.024254	0.0308095	0.0140476		0.015619	0	0.0265714		0	0	0.00601333		0.0203016	0.135778	0.104143		0.0273333	0	0.0263492		0.0216825	0.052873	0.0747867		0	0.0313492	0.0321905		0.0791429	0	0.0139365
BIO9	0	0	0		0	0.0643492	0.0182857		0	0	0		0	0	0		0.0722222	0	0		0	0.039127	0		0	0	0		0	0	0.194127		0.0599206	0	0		0	0	0		0.0509683	0.0261587	0.100857		0.0730159	0.0199841	0
Tbulkdensity	0	0.0113175	0.00855556		0	0	0.00403175		0.0068254	0.047	0.0104444		0.00752381	0.0088254	0		0	0	0		0.00577778	0.00220635	0.00712698		0	0.00753968	0.00226667		0.00274603	0.00625397	0.0145238		0.0126984	0.00396825	0.00292063		0	0	0.00245333		0	0.001	0.00947619		0.0044127	0.00533333	0.00542857
Tclay	0.00915873	0.0385714	0		0.0146349	0	0		0.00893651	0.0225714	0		0.0103016	0.0116032	0.0221429		0	0.0202857	0.00709524		0.0386508	0	0.00984127		0	0.0101429	0.00262667		0.00939682	0.028746	0.0112698		0.038	0	0.0161429		0.0157778	0.0298889	0.00816667		0.012873	0.0163333	0.011746		0.0139524	0.00849206	0.0123333
Crop	0.0173968	0	0		0.0231587	0.0187143	0.01		0.0188254	0.0195873	0.0353175		0.00876191	0	0		0.0207619	0.0199524	0.00749206		0	0.0407778	0.0136349		0	0	0.00210667		0.0125079	0.0510952	0.0614921		0.020254	0.043127	0.0787778		0	0	0.0178733		0.075746	0.0283175	0.0182381		0.0105873	0.00755556	0.0834444
Drainage	0.00753968	0	0		0.0356825	0.000634921	0.00150794		0.00176191	0.00236508	0.00147619		0.00234921	0.00744444	0.0301429		0	0.020619	0.00163492		0.00747619	0.00247619	0.00196825		0	0.00193651	0.000606667		0.00169841	0.00239682	0.016254		0.00474603	0.00288889	0.00242857		0.00226984	0.0166349	0.0009		0.0126984	0.00209524	0.00233333		0.00249206	0.000285714	0.00342857
Elevation	0.0523968	0.0592857	0.0563016		0.0768254	0.0719048	0.0364762		0	0	0.0196667		0	0.0613492	0.147222		0.157048	0.0849365	0.0444921		0.0732063	0.0293333	0		0.239587	0.0991429	0.0775667		0.0225079	0.0370159	0		0	0.0268889	0.0178889		0.0679683	0.0634762	0.02066		0.0567778	0.0367778	0.0988571		0.0349841	0.0389524	0.0746349
Tgravel	0.00707936	0.0161746	0.00687302		0.0185397	0	0.00346032		0.0241905	0.0310476	0.00677778		0.00407936	0.00833333	0.0365079		0.00552381	0.0202381	0.00406349		0.0386667	0.00333333	0.00773016		0.0117937	0.00252381	0.00218		0.00723809	0.0140159	0.0184286		0.0140159	0.0200317	0.00725397		0.00807936	0.0203492	0.00213333		0.0220476	0.00371429	0.0143968		0.00561905	0.00260318	0.0119841
Toc	0.0115238	0	0		0.00839683	0	0.00363492		0.00553968	0.00812698	0.00623809		0.00655556	0.00349206	0.0204286		0	0	0.00957143		0.0131587	0.0037619	0.00684127		0.0303651	0	0		0	0	0.018619		0.010254	0.00803175	0.0127302		0.00530159	0	0.00155333		0.00593651	0.00346032	0.0180635		0.00442857	0.00938095	0.00531746
Pastr	0.00987302	0	0		0.0233968	0	0.00826984		0.0533968	0.0556667	0.0301905		0.0536667	0.0454921	0		0.076	0.123429	0.0192857		0.0244603	0.00419048	0.0141746		0	0	0.00859333		0.0249524	0.0439683	0.0949206		0.00520635	0.00885714	0.0144286		0.0348889	0	0.01336		0.0347778	0.0111111	0.0113968		0.016254	0.00830159	0.0169206
TpH	0	0	0		0	0	0		0	0.0221111	0.0027619		0	0	0		0	0	0		0	0	0		0	0	0		0	0	0		0	0	0		0	0	0		0	0	0		0	0	0
Primf	0.0380952	0.117905	0.138333		0.0282063	0.0715714	0.0301111		0.0382381	0.0115714	0.00639683		0.0105873	0.0232857	0.0677143		0.0407937	0.0140952	0.0130476		0.0575238	0.0260952	0.0503016		0.0587937	0.0115397	0.00892667		0.0433492	0.0589206	0.0345079		0.0154127	0.0681111	0.0566984		0.0149206	0.115159	0.0750333		0.0406825	0.0276032	0.0122857		0.0124921	0.0124921	0.0492698
Primn	0.00869841	0.0167143	0.0125079		0.0133333	0.0175873	0.010619		0.00644444	0.0116508	0.010746		0.00876191	0.0114444	0.0425873		0	0.00561905	0.00380952		0.0536825	0.0277143	0.0255873		0.0298254	0	0.00414		0.00639683	0.0161429	0.0132222		0.0447619	0.052746	0.0453175		0.016	0.00895238	0.00601333		0.0342063	0.0411587	0.00895238		0.00698413	0.0204444	0.0363175
Rang	0.0183333	0.0256508	0		0.0188413	0.0285714	0.0165397		0.0142063	0.0316984	0.023127		0.0214444	0.0204286	0		0.0365873	0.0571905	0.00833333		0.0370635	0.021381	0.0212857		0	0	0.0103333		0.00447619	0.0203492	0.0396984		0.00730159	0.0325556	0.042746		0.0442698	0.0384127	0.00474		0.0417619	0.040873	0.00887302		0.0113651	0.0173333	0.0791429
Refdepth	0.0130794	0.0257778	0.0147143		0.013	0.0415397	0		0.00511111	0.0267778	0.00619048		0.00611111	0.00606349	0.0211746		0	0	0.00595238		0	0.00198413	0.00292063		0.0195873	0.0110794	0.00152		0.00514286	0.0133016	0		0.0118095	0.00622222	0.0078254		0.0085873	0.0478889	0.00548667		0.0232063	0.00576191	0.00828571		0.0054127	0.00290476	0.00365079
Tsand	0	0	0		0.052746	0.0236349	0.00588889		0.0154127	0.0223016	0.00850794		0.0144127	0	0		0.020127	0.0217937	0.0250635		0	0.00738095	0.00501587		0.0198254	0	0.00475333		0.012873	0.0377778	0.0160159		0.0529048	0.0184444	0.0180317		0.0124603	0	0.0100533		0	0.0173175	0.0139841		0.0119206	0.00712698	0
Secdf	0.0602857	0.024381	0.0268413		0	0	0.0120635		0.00593651	0.0194603	0.00650794		0.00490476	0.0108413	0.079381		0.0192381	0	0.00463492		0.0391111	0.00420635	0.0098254		0.0316825	0.016254	0.00116667		0.00815873	0.00892063	0		0.00173016	0.00426984	0.00898413		0.0479206	0.037	0.00174		0.0303968	0.0142063	0.00234921		0.00533333	0.00688889	0.010746
Secdn	0.00728571	0	0.0291905		0.00907937	0	0.00828571		0.0103492	0.00850794	0.0165714		0.0131111	0.0113968	0.0320952		0.0240635	0.00579365	0.00261905		0	0.00936508	0.012619		0.0409365	0	0.00157333		0.00730159	0.0132857	0.0108095		0.131222	0.067	0.0367619		0.010254	0	0.00109333		0.0438571	0.0169048	0.0240952		0.0105397	0.00896825	0.031254
Tsilt	0.00696825	0.0265873	0		0.0296349	0.0319524	0.00750794		0.00696825	0.019746	0.00809524		0.0114127	0	0.0425397		0.0225079	0.0144921	0.00630159		0.0454444	0.00695238	0.00422222		0	0.0143333	0.00344667		0.00952381	0.0340317	0.0121905		0.0248413	0.0163968	0.0195397		0.0144921	0.0234444	0.00976667		0.0301429	0.00561905	0.0180159		0.00814286	0.00604762	0.00774603
Slope	0.012127	0.0463333	0.0302381		0.0420476	0.0191746	0.0166032		0.0254444	0.0190159	0.0260476		0.0104286	0.0207937	0.165016		0.0406508	0.0702857	0.0370794		0.081873	0.0149683	0.0231905		0.124968	0.0590794	0.00597333		0.00993651	0.0193651	0.0509683		0.0611111	0.0659841	0.0226984		0.115683	0.0940159	0.02352		0	0.0373016	0.0402222		0.0270952	0.0109048	0.0167302
Tcec	0	0.0105397	0.00973016		0.0140794	0	0.00596825		0	0.00757143	0		0	0	0		0.0215556	0.0214603	0.0101746		0	0	0.0157143		0	0.00584127	0.00324667		0.00296825	0.00784127	0.0158254		0.0178413	0.0108095	0.00825397		0.0109841	0.0137778	0		0	0	0.010873		0.00984127	0.00860317	0.00738095
Tbs	0.0186984	0.0206349	0.0193175		0.0147302	0	0.00425397		0.0154603	0	0		0.0048254	0.00925397	0.0875714		0.0330952	0.0206984	0.00936508		0.0411746	0.0115873	0.00944444		0.0253968	0	0.00261333		0.00571429	0.00493651	0.0207302		0.0193016	0.0154762	0.00896825		0.0124286	0.0257619	0.00801333		0.037254	0.0156349	0.0195397		0.0123016	0.0123968	0.00752381
Tesp	0.00439683	0.00668254	0.00979365		0.0110317	0	0.00415873		0.00509524	0	0.00736508		0.00325397	0.00206349	0.0126349		0.0233175	0.00771429	0.00287302		0.0240635	0.00125397	0		0.0166349	0.00320635	0.000766667		0	0.00334921	0.00334921		0.0025873	0.00242857	0.00312698		0.00187302	0	0.00028		0.0166667	0	0.00644444		0.00423809	0.00103175	0
Ttexture	0	0	0.00334921		0.00811111	0	0		0	0	0.00434921		0	0	0		0	0	0		0	0	0		0.0091746	0	0		0	0	0		0	0.00655556	0		0	0	0		0	0	0		0	0	0
Tece	0.00104762	0.00296825	0.0104762		0	0	0.000253968		0	0.0276508	0.00106349		0.00192063	0.00331746	0.00830159		0	0.00723809	0		0.007	0.00196825	0.00109524		0	0	0.00014		0.00192063	0	0		0	0.00803175	0.00390476		0.00171429	0	0		0.00666667	0.000936508	0.003		0.00233333	0.00198413	0.000920635
Tteb	0	0	0		0	0.0298889	0		0	0	0.00639683		0.00860317	0	0		0	0	0		0.0467143	0.00726984	0		0.0205714	0	0		0	0	0		0	0	0		0	0	0.00604		0.0147778	0.00876191	0		0	0	0
Urban	0.010381	0.0279683	0.00925397		0.00925397	0.0655556	0.0911905		0.0227143	0.133333	0.0515714		0.0954921	0	0.133635		0.407143	0.117397	0.330825		0.481778	0.108365	0.171032		0	0	0.04254		0.072619	0.106698	0.0302857		0.022746	0.0121429	0.0165238		0.0924762	0	0.0465133		0.399698	0.26819	0.300016		0.128095	0.26346	0.120444
